# Supplementary material
Source: PubMed Central journal article supplement (PMC5930893)
Supplement: tpmd170619.SD1.pdf [file tpmd170619.SD1.pdf]

SUPPLEMENTAL TABLE 1

Odds ratios (ORs) and 95% confidence intervals (CIs) for community bed net use and microscopy results using multi-level logistic regression,  $N = 3,187$

|                                                      | Model 1—crude                                               |              | Model 2—fully adjusted              |                | Model 3—interaction                 |              |                                     |              |
|------------------------------------------------------|-------------------------------------------------------------|--------------|-------------------------------------|----------------|-------------------------------------|--------------|-------------------------------------|--------------|
|                                                      |                                                             |              |                                     |                | Rural                               |              | Urban                               |              |
|                                                      | Prevalence odds ratio (POR) of testing positive for malaria | 95% CI       | POR of testing positive for malaria | 95% CI         | POR of testing positive for malaria | 95% CI       | POR of testing positive for malaria | 95% CI       |
| 1% increase in community bed net use                 | 1.01                                                        | (0.99, 1.03) | 1.01                                | (1.00, 1.0299) | 1.01                                | (0.99, 1.03) | 0.40                                | (0.15, 1.09) |
| 10% increase in community bed net use                | 1.08                                                        | (0.91, 1.29) | 1.16                                | (1.00, 1.34)   | 1.14                                | (0.94, 1.38) | 0.46                                | (0.19, 1.38) |
| Slept under bed net vs. did not sleep under bed net* | 0.82                                                        | (0.77, 0.87) | 0.83                                | (0.78, 0.89)   | 0.83                                |              |                                     | (0.78, 0.89) |

ORs and 95% CIs for each variable in the multi-level logistic regression model, using microscopy results as the outcome. Model 1 includes community and individual bed net use, model 2 includes model 1 variables plus all covariates (gender, age [quadratic], wealth, and urbanicity), and model 3 includes all model 2 variables plus an interaction term between urbanicity and community bed net use. Row 3 shows OR (95% CI) for individual bed net use and malaria parasitemia.

\* Model 3 estimate is for all communities, not stratified by urbanicity.
